# **A randomized controlled trial of antibody response to 2019-20 cell-based inactivated and egg-based live attenuated influenza vaccines in children and young adults**

**Authors:** Katherine V. Williams<sup>a,\*</sup>, Bo Zhai<sup>b</sup>, John F. Alcorn<sup>b,c</sup>, Mary Patricia Nowalk<sup>a</sup>, Min Z. Levine<sup>d</sup>, Sara S. Kim<sup>d</sup>, Brendan Flannery<sup>d</sup>, Krissy Moehling Geffel<sup>a</sup>, Amanda Jaber Merranko<sup>e</sup>, Jennifer P. Nagg<sup>c</sup>, Mark Collins<sup>a</sup>, Michael Susick<sup>a</sup>, Karen S. Clarke<sup>a</sup>, Richard K. Zimmerman<sup>a</sup>, Judith M. Martin<sup>c</sup>

<sup>a</sup>Department of Family Medicine, University of Pittsburgh, 4420 Bayard Street, Suite 520, Pittsburgh, PA 15260, USA

<sup>b</sup>Department of Immunology, University of Pittsburgh, 9127 Rangos Research Center, 4401 Penn Avenue, Pittsburgh, PA 15224 USA

<sup>c</sup>Department of Pediatrics, University of Pittsburgh, 3520 Fifth Avenue, Pittsburgh, PA 15213, USA

<sup>d</sup>National Center Immunizations and Respiratory Disease, Center for Disease Control and Prevention, Atlanta, GA, USA

<sup>e</sup>Falk Pharmacy, University of Pittsburgh Medical Center (UPMC), 3601 Fifth Avenue, Pittsburgh, PA 15213, USA

## **Abstract**

**Background:** Hemagglutination inhibition (HAI) titers to the live-attenuated influenza vaccine (LAIV4) are typically lower than its counterpart egg-based inactivated influenza vaccines (IIV). Similar comparisons have not been made between LAIV4 and the 4-strain, cell-culture inactivated influenza vaccine (cclIV4). We compared healthy children and young adult HAI titers against the 2019-2020 LAIV4 and cclIV4.

**Methods:** Participants aged 4-21 years were randomized 1:1 to receive cclIV4 (n =100) or LAIV4 (n=98). Blood was drawn prevaccination and on day 28 (21-35) post vaccination. HAI assays against egg-grown A/H1N1, A/H3N2, both vaccine B strains and cell-grown A/H3N2 antigens were conducted. Outcomes were geometric mean titers (GMT) and geometric mean fold rise (GMFR) in titers.

**Results.** GMTs to A/H1N1, A/H3N2 and B/Victoria increased following both cclIV and LAIV and to B/Yamagata following cclIV ( $p < 0.05$ ). The GMFR range was 2.4-3.0 times higher for cclIV4 than for LAIV4 ( $p < 0.001$ ). Within vaccine types, egg-grown A/H3N2 GMTs were higher ( $p < 0.05$ ) than cell-grown GMTs [cclIV4 day 28: egg=205 (95% CI: 178-237); cell=136 (95% CI: 113-165); LAIV4 day 28: egg=96 (95% CI: 83-112); cell=63 (95% CI: 58-74)]. The GMFR to A/H3N2 cell-grown and egg-grown antigens were similar. Pre-vaccination titers inversely predicted GMFR.

**Conclusion:** The HAI response to cclIV4 was greater than LAIV4 in this study of mostly older children, and day 0 HAI titers inversely predicted GMFR for both vaccines. For both vaccines, the A/H3N2 cell-grown antigen levels were lower than egg-grown, but the GMFR for cell-grown and egg-grown did not differ significantly within vaccine type.

46 **\*Corresponding author:** Department of Pediatrics, General Academic Pediatrics,  
 47 3520 Fifth Ave., Pittsburgh, PA, USA. [judy.martin@chp.edu](mailto:judy.martin@chp.edu) (JM Martin)  
 48 **Additional author emails:** KVV [williamskv@upmc.edu](mailto:williamskv@upmc.edu); BZ [bo.zhai@chp.edu](mailto:bo.zhai@chp.edu); JFA  
 49 [John.Alcorn@chp.edu](mailto:John.Alcorn@chp.edu); MPN [tnowalk@pitt.edu](mailto:tnowalk@pitt.edu); MZL [mwl2@cdc.gov](mailto:mwl2@cdc.gov); SSK:  
 50 [omy1@cdc.gov](mailto:omy1@cdc.gov); BF [bif4@cdc.gov](mailto:bif4@cdc.gov); KMG [kkm17@pitt.edu](mailto:kkm17@pitt.edu); AJM [jabera@upmc.edu](mailto:jabera@upmc.edu);  
 51 JPN [Jennifer.Nagg@chp.edu](mailto:Jennifer.Nagg@chp.edu); MC [mjc@pitt.edu](mailto:mjc@pitt.edu); MS [susickm@upmc.edu](mailto:susickm@upmc.edu); KSC  
 52 [KAC373@pitt.edu](mailto:KAC373@pitt.edu); RKZ [zimmerk@upmc.edu](mailto:zimmerk@upmc.edu).  
 53 **Key words:** influenza, influenza vaccine, hemagglutination inhibition assay, cell-  
 54 culture-based inactivated influenza vaccine, egg-based live attenuated influenza  
 55 vaccine, randomized controlled trial  
 56 **Clinical Trials No.:** NCT03982069  
 57 **Abbreviations:**  
 58 HAI - hemagglutination inhibition assay  
 59 IIV - inactivated influenza vaccine  
 60 cclIV4 - cell-culture-based inactivated influenza vaccine quadrivalent  
 61 LAIV4 - Egg-based live attenuated influenza vaccine quadrivalent  
 62 EMR - Electronic medical record  
 63 RDE - Receptor-destroying enzyme  
 64 PBS - Phosphate-buffered saline  
 65 CDC - Centers for Disease Control and Prevention  
 66 FDA - Food and Drug Administration  
 67 GMT - Geometric mean titers  
 68 GMFR - Geometric mean fold rise  
 69 ACIP - Advisory Committee on Immunization Practice  
 70 PA-SIIS - Pennsylvania Statewide Immunization Information System

# **Abstract**

*Background:* Hemagglutination inhibition (HAI) titers to the live-attenuated influenza vaccine (LAIV4) are typically lower than its counterpart egg-based inactivated influenza vaccines (IIV). Similar comparisons have not been made between LAIV4 and the 4-strain, cell-culture inactivated influenza vaccine (ccIIV4). We compared healthy children and young adult HAI titers against the 2019-2020 LAIV4 and ccIIV4.

*Methods:* Participants aged 4-21 years were randomized 1:1 to receive ccIIV4 (n =100) or LAIV4 (n=98). Blood was drawn prevaccination and on day 28 (21-35) post vaccination. HAI assays against egg-grown A/H1N1, A/H3N2, both vaccine B strains and cell-grown A/H3N2 antigens were conducted. Outcomes were geometric mean titers (GMT) and geometric mean fold rise (GMFR) in titers.

*Results.* GMTs to A/H1N1, A/H3N2 and B/Victoria increased following both ccIIV and LAIV and to B/Yamagata following ccIIV ( $p<0.05$ ). The GMFR range was 2.4-3.0 times higher for ccIIV4 than for LAIV4 ( $p<0.001$ ). Within vaccine types, egg-grown A/H3N2 GMTs were higher ( $p<0.05$ ) than cell-grown GMTs [ccIIV4 day 28: egg=205 (95% CI: 178-237); cell=136 (95% CI:113-165); LAIV4 day 28: egg=96 (95% CI: 83-112); cell=63 (95% CI: 58-74)]. The GMFR to A/H3N2 cell-grown and egg-grown antigens were similar. Pre-vaccination titers inversely predicted GMFR.

*Conclusion:* The HAI response to ccIIV4 was greater than LAIV4 in this study of mostly older children, and day 0 HAI titers inversely predicted GMFR for both vaccines. For both vaccines, the A/H3N2 cell-grown antigen levels were lower than egg-grown, but the GMFR for cell-grown and egg-grown did not differ significantly within vaccine type.

## 96 1. Introduction

97 Influenza is a major public health burden causing millions of illnesses and  
 98 outpatient visits and resulting in tens of thousands of hospitalizations and deaths in  
 99 the U.S. annually [1]. Vaccination is the primary influenza prevention method.  
 100 Advances in vaccine technology have resulted in multiple vaccine types licensed for  
 101 use in the U.S., comprising intramuscularly administered inactivated influenza  
 102 vaccines (IIV), including a quadrivalent cell culture-based inactivated vaccine  
 103 (ccIIV4), and nasally administered, egg-based live attenuated influenza vaccine  
 104 (LAIV4). The Advisory Committee on Immunization Practice (ACIP), which sets  
 105 civilian immunization policy for the United States, recommends vaccination with any  
 106 licensed vaccine, without preference [2].

107 Several factors can affect the immune response to either vaccine type,  
 108 including pre-existing antibodies, prior vaccination status, and age [3-5]. Nasally  
 109 administered LAIV4, which is absorbed through the nasal mucosa, generates an  
 110 immune response that differs from direct systemic exposure from intramuscularly  
 111 administered IIV [6]. Moreover, the manufacturing process may have an impact on  
 112 immune response. For example, the viruses used for vaccine antigens can be  
 113 grown in mammalian cell culture or embryonated chicken eggs. Growth in cell  
 114 culture has the advantage of limiting the virus mutations that often occur during the  
 115 egg-based manufacturing process. While, egg-based LAIV4 has been shown to be  
 116 more effective against antigenically different or drifted strains [7], egg-induced  
 117 mutations in influenza A(H3N2) vaccine viruses have resulted in reduced efficacy of  
 118 egg-based vaccines [8].

119 Previous research comparing the hemagglutination inhibition (HAI) antibody  
 120 responses of IIV and LAIV4 has historically demonstrated lower HAI titers in

response to LAIV compared to egg-based IIV [3, 6, 9, 10]. These studies were conducted before the reformulation of LAIV4 necessitated by poor vaccine effectiveness [11]. In a previous study among children, we found no differences in seroconversion in children receiving egg- or cell-grown IIV in 2018-19 [12]. The cell-grown IIV4 used in that study contained A/H1N1 that was derived from an egg-based seed leading to a 3:1 cell to egg formulation. The 2019-20 season is the first in which the cclIV4 formulation is exclusively cell-based. Furthermore, the current LAIV4 has been reformulated to avoid the egg-induced mutations to the A/H3N2 antigen. Thus, a comparison of the HAI response to egg- and cell-based antigens for each vaccine in a clinical setting of children and young adults is warranted.

The purpose of this randomized controlled trial was to quantify and compare pre- and post vaccination HAI responses to 2019-20 LAIV4 and cclIV4, among a racially diverse group of children and young adults during the 2019-20 influenza season.

## 2. Methods

The Institutional Review Boards at the University of Pittsburgh and the Centers for Disease Control and Prevention (CDC) approved this study. Written informed consent and assent, where appropriate, were obtained from all participants and/or their parents/legal guardians prior to beginning study procedures.

### 2.1 Study Design and Participants

This study was a randomized controlled clinical trial comparing the serologic antibody response to two quadrivalent 2019-20 influenza vaccines: cclIV4 (Seqirus Flucelvax®, lot 261199, 261203) administered intramuscularly in the upper arm deltoid muscle with a 25-gauge 1 inch needle and egg-based LAIV4 (AstraZeneca FluMist®, lot LJ2514) administered intranasally with one metered spray in each nostril.

Healthy participants included patients ages 4-17 years who receive primary care at pediatric and family medicine clinics. These children typically receive annual IV [13] and thus tend to have higher pre-vaccination HAI titers. Other participants up to age 21 who were unvaccinated in the prior season (2018-19) and thus would be expected to have lower pre-vaccination HAI titers, also participated. Participants were recruited and enrolled from September 20, 2019 through November 13, 2019 through: 1) mailings to past research participants; 2) personal approach by research assistants/nurses at well-child visits at five primary care health centers (one pediatric and four family medicine practices); and 3) targeted emails to 18-21-year-olds enrolled in an institutional participant-centered research registry. Recruitment ended when the targeted number for enrollment goal was achieved. All study vaccinations were completed by November 25, 2019, prior to regional circulation of influenza virus; the final participant visit was completed on December 18, 2019. Verification of

prior year vaccination status was confirmed through the Pennsylvania Statewide Immunization Information System (PA-SIIS) vaccine registry.

Eligibility criteria included parental consent for randomization to receive one of the two 2019-20 FDA approved influenza vaccines used in the study. Exclusion criteria included: weight <16.8 kg (37 lb.); known to be pregnant; an immunosuppressing health condition or taking immunosuppressant medications; having already received the 2019-20 influenza vaccine; not able to complete all study visits in the appropriate time window; contraindications to LAIV4 (asthma with treatment for wheezing in the past year, individuals who may have contact with severely immunosuppressed persons) or conditions with precautions to LAIV4 vaccine (disorders of the cardiovascular system, seizures, diabetes mellitus, renal or hepatic disease) or severe allergies to eggs or influenza vaccine components.

Following screening and consent, a blood sample was drawn. Participants were then randomized to receive one of the two study vaccines in an unblinded manner. In order to ensure that roughly the same number of each vaccine types were administered at each of the enrollment sites, participants were randomized in blocks of four. Sequentially numbered vaccine assignment cards were computer generated based on 1:1 randomization for each vaccine type. The next available numbered card was used to instruct the clinical staff which vaccine to administer under standard vaccination protocols. While the participant and research team were not blinded to randomization allocation, the laboratory team was unaware of participants' group assignment.

## 2.2 Demographic data collection

Baseline data were collected with entry into REDCap™, a secure, online database management system. Baseline demographics included age, and self-

identified: sex, race, ethnicity, parental educational status, and health insurance coverage.

### 2.3 Hemagglutination inhibition assay

Whole blood samples were obtained on participants pre-vaccination and 28 days (range 21-35 days) post influenza vaccination in BD Vacutainer™ serum separator tubes with polymer gel/silica activator additive (BD 367989). Tubes were held at room temperature and taken to the processing laboratory within 4 hours of being drawn. Aliquoted serum samples were frozen at -80°C until assayed.

Assays were conducted as previously described [11]. Sera were heat inactivated, tested for nonspecific agglutinins, and adsorbed as needed. Sera were serially diluted 2-fold and incubated with 4 hemagglutination units per 25 µL of virus with erythrocytes for quantification of HAI titers. Turkey erythrocytes were used for the testing of A/H1N1 and B influenza viruses, Guinea pig erythrocytes with 20 mM oseltamivir were used for the testing of A/H3N2 viruses. HAI titer was defined as the reciprocal of the last dilution of serum that completely inhibited hemagglutination. Antibody titers <10 (initial sera dilution) were reported as 5 for analysis. Sera for both vaccine types were tested in HAI assays against egg-grown vaccine strains included in the 2019-20 influenza vaccines (A/Brisbane/02/2018 (H1N1)pdm09, A/Kansas/14/2017 (A/H3N2), B/Colorado/06/2017 (B/Victoria lineage) and B/Phuket/3073/2013 (B/Yamagata lineage), as well as an available cell-grown HAI assay for A/Kansas/14/2017 A/(H3N2).

### 2.4 Statistical analysis

Primary outcome measures were post vaccination geometric mean titers (GMT) and geometric mean fold-rise (GMFR) in titers from day 0 to day 28. Secondary outcomes were defined as an HAI titer either 1: ≥40 or 1: ≥110 and



seroconversion, defined as a four-fold rise in titer with day 28 post vaccination titer  $\geq 40$ .

Based on previous research comparing seroconversion rates for LAIV4 and cclIV4, it was determined that a sample size of 200 would be needed to achieve an 80% power to detect a significant difference between vaccine types for seroconversion with a moderate effect size of 0.2 [11]. Due to high prevaccination GMT, the primary outcome of this study is reported as GMT and GMFR in titers. A post hoc power calculation of A/H1N1-A/Brisbane day 28 titer outcomes revealed a sample size of 200 had power of 99.8% to detect a difference between vaccine types for day 28 GMT, GMFR in titers and seroconversion.

Summary statistics of dichotomous variables were conducted by vaccine group using chi-square/Fisher exact tests for categorical variables and t-tests for continuous variables. Fold-rise was calculated as the ratio of the postvaccination titer to the prevaccination titer. HAI and fold-rise were  $\log_2$ -transformed in order to perform t-tests and linear regressions. GMTs, GMFR, and 95% confidence intervals were calculated using the survey means procedure in SAS. Linear regression was used to examine associations between fold-rise controlling for age, pre-vaccination titers, and prior season (2018-19) vaccination status as previously described [14]. All analytical procedures were performed using SAS® 9.4 (Cary, NC). Statistical significance of two-sided tests was set at type I error ( $\alpha$ )=0.05.

### 3. Results

Of 234 persons aged 4 to 21 years assessed for eligibility, 16 were excluded and 218 were randomized: 110 received cclIV4 and 108 LAIV4. After randomization, 20 participants were excluded from the per-protocol analysis: 19 failed to return for post-vaccination specimen collection or were missing paired sera, and one participant in the cclIV4 group received LAIV4. Per-protocol analysis included 198 individuals: 100 received cclIV4 and 98 received LAIV4 (Figure 1).

Patient characteristics were similar for the two vaccine arms (Table 1). Overall, 55% of participants were age 18-21 years, 63% were female, 48% were non-white and 16% were obese. Nearly half of participants were publicly insured, 14% were exposed to household smoking and the majority of parents had less than college education. Differences in prior season influenza vaccination (52% vs 47%) were not statistically significant ( $p=0.48$ ).

Pre- and post-vaccination GMTs and mean fold rise in HAI titers are shown by vaccine group in Table 2. Pre-vaccination titers were similar by vaccine group across all antigens; 72%-85% had titers  $\geq 1:40$  and 14%-61% had titers  $\geq 1:110$ . After vaccination, GMTs increased significantly against all antigens except among LAIV4 recipients against B/Phuket (Yamagata lineage). All measures of post-vaccination titers, i.e., GMTs, GMFR and proportions with HAI titers  $\geq 1:40$  and  $\geq 1:110$ , were significantly higher among cclIV4 recipients than LAIV4 recipients across all antigens (all  $p \leq 0.02$ ; Table 2). There was no significant difference between GMFR in antibody titer for A/H3N2 tested against cell-grown antigen and A/H3N2 tested against egg-grown antigen. Responses to the A/H3N2 antigens in cclIV4 and LAIV4 recipients are shown in Figure 2.

Figures 3a and 3b show patterns of antibody response to vaccination for all antigens. For both cclIV4 and LAIV4, antibody titers for most participants increased or remained similar to pre-vaccination; greater than two-fold decreased titers were observed in few participants in both vaccine groups. However, patterns of antibody response to vaccination differed significantly by vaccine type across all antigens, including against cell-grown and egg-grown A/H3N2 antigens. For the cclIV4 recipients, a strong “ceiling” effect was observed, with post vaccination titers reaching similar levels across a range of prevaccination titers; whereas antibody titers among LAIV recipients increased more variably from pre- to post vaccination. In regression analyses, lower pre-vaccination titers were associated with greater GMFR in titers in both vaccine groups, although the association was much stronger in the cclIV4 recipients. Controlling for pre-vaccination HAI titer, prior season (2018-19) vaccination was associated with decreased GMFR against B/Colorado-B/Victoria in cclIV4 recipients ( $\beta = -0.88$ ,  $p < 0.001$ ). With similar adjustments, prior season vaccination was associated with increased GMFR against A/H3N2-A/Kansas egg-grown antigens ( $\beta = 0.17$ ,  $p < 0.01$ ) in LAIV4 recipients, but was not independently associated with GMFR against other antigens.

## 4. Discussion

This randomized controlled trial compared antibody responses to cell-grown (ccIIV4) and egg-grown (LAIV4) influenza vaccine in a racially diverse group of children and young adults. Compared to previous work, which used a ccIIV4 formulation with three cell-grown antigens and one egg-grown antigen (A/H1N1), this study used a ccIIV4 composed entirely of cell-based antigens. LAIV4 was composed entirely of egg-grown antigens. A/H3N2 strains have become increasingly glycosylated as a result of adaptations required for growth in eggs. These adaptations have led to antigenic differences between vaccine strains and the wild virus [15] and reduced vaccine effectiveness. Thus, cell-grown vaccine strains offer the potential to avoid HA protein mutations that occur in egg-based systems [16].

For all measures of HAI response, ccIIV4 elicited significantly larger increases than LAIV4 at 28 days post vaccination. For LAIV4, HAI response was attenuated and seroconversion was infrequent. Our findings are consistent with previous work showing .no HAI marker as a correlate of protection for LAIV4 [17].

Lower HAI responses to LAIV compared to IIV have been reported in prior seasons [3, 6, 9, 10]. Our findings with the 2019-20 LAIV4 formulation and fully cell-based ccIIV4 follow a similar pattern. Prior studies have similarly shown a lower HAI response to LAIV in countries where influenza vaccines are routinely administered, although a few earlier studies showed a significant HAI response to LAIV prior to the initiation of routine seasonal vaccination in children [17]. Because of different routes of administration for the two vaccine types, secretory IgA and cellular immune processes stimulated by administration via the nasal route may be a better measure of immune response than HAI for LAIV4 influenza vaccine [6, 10, 18]. Measures of immunoglobulins (IgG and IgA) and cellular immune responses would help delineate

the potential for differences between the vaccine groups not observed in HAI titers alone.

When comparing the relationship of pre- to post vaccination titers, with cclIV4 in particular, those with lower pre-vaccination titers had the greatest increase. For both cclIV4 and LAIV4, participants with high baseline titers remained high. Pre-vaccination titer was predictor of post-vaccination titer (positively correlated) and GMFR (negatively correlated). We found similar relative GMFR increases in A/H3N2 cell- and egg-grown antigens within vaccine type in the 2019-20 season.

A prior study in 2018-19, comparing cclIV4 with 3 cell-grown and 1 egg-grown strains and LAIV4, which incorporated microneutralization measures, found that the GMFR measured using egg-grown A/H3N2 antigen was higher for egg-based vaccine than cell-based vaccine recipients [12]. In the current study, GMFR responses to egg- and cell-grown A/H3N2 antigens were similar within vaccine type. Thus, the question of response based on the antigen growth medium is still unresolved.

Due to the known effect of baseline titers and prior vaccination history on vaccine response [18], we specifically recruited participants who were not vaccinated in the prior season anticipating that they may have lower titers pre-vaccination and be more likely to mount an HAI response. In post hoc analyses, pre-vaccination titer was a negative predictor of vaccine response for both vaccines, with a greater rise in titer among those with lower pre-vaccination titers. Despite the large proportion of participants unvaccinated in the prior year, only the HAI response to B/Colorado-B/Victoria components of both the 2018-19 and 2019-20 vaccines, had an independent association with a smaller GMFR. Prior year vaccination status predicted pre-vaccination titers and fold-rise in titers, vaccination with cclIV4

remaining a stronger predictor of fold-rise after adjusting for prior year vaccination status. Pre-vaccination titers as well as prior year vaccination status should be considered in determination of degree of vaccine response.

#### *4.1 Strengths and Limitations*

A strength of this study was the relatively large randomized controlled sample. Small sample size within the youngest age group limited power to detect differences by age. Participants were historically highly vaccinated with high pre-vaccination titers, and repeated vaccination with egg-based vaccines may affect antibody responses to cell-based antigens. Overall, immune responses may not predict vaccine effectiveness, especially for LAIV for which better correlates of protection are needed.

#### *4.2 Conclusions*

In this racially diverse group of children and young adults, half of whom were unvaccinated in the prior season, all measures of HAI titers were higher among cclIV4 recipients than LAIV recipients. Even among vaccine recipients with high pre-vaccination titers, HAI titers remained high post vaccination. Responses to cclIV4 and LAIV4 as measured by GMFR were consistent against egg- and cell-grown antigens. Future studies are needed to examine the immunoglobulin and cellular immune responses in the 2019-20 season to cclIV4 and LAIV4.

#### **Funding and support**

This work was supported by the Centers for Disease Control and Prevention (CDC) [5U01IP001035] and by National Institutes of Health (NIH) [UL1TR001857], [KL2 TR001856], and/or [TL1 TR001858]. This work represents the views of the authors and not the CDC or NIH.

348 Pennsylvania Statewide Immunization Information System (PA-SIIS) vaccine  
 349 registry was used to verify vaccination status. These data were supplied in part by  
 350 the Bureau of Health Statistics & Registries, Pennsylvania Department of Health,  
 351 Harrisburg, Pennsylvania. The Pennsylvania Department of Health specifically  
 352 disclaims responsibility for any analyses, interpretations, or conclusions.

353 REDCap and the Department of Biomedical Informatics grant support (Clinical  
 354 and Translational Sciences Institute at the University of Pittsburgh Grant Number  
 355 UL1-TR-001857). Study data were collected and managed using REDCap electronic  
 356 data capture tools hosted at the University of Pittsburgh.

357 **Conflict of Interest:** RKZ has received funding by Sanofi for an unrelated study.  
 358 MPN has research funding from Merck & Co., Inc. for an unrelated study. JMM has  
 359 received funding from Merck, Sharp and Dohme for an unrelated study.

360

## 5. References Cited

- [1] Centers for Disease Control. Disease Burden of Influenza.  
<https://www.cdc.gov/flu/about/burden/index.html>. Accessed June 30, 2021.
- [2] Grohskopf LA, Alyanak E, Broder KR, Walter EB, Fry AM, Jernigan DB. Prevention and Control of Seasonal Influenza with Vaccines: Recommendations of the Advisory Committee on Immunization Practices - United States, 2019-20 Influenza Season. MMWR Recommendations and reports : Morbidity and mortality weekly report Recommendations and reports. 2019;68:1-21. 10.15585/mmwr.rr6803a1
- [3] King JP, McLean HQ, Meece JK, Levine MZ, Spencer SM, Flannery B, et al. Vaccine failure and serologic response to live attenuated and inactivated influenza vaccines in children during the 2013–2014 season. Vaccine. 2018;36. 10.1016/j.vaccine.2018.01.016
- [4] Nuñez IA, Carlock MA, Allen JD, Owino SO, Moehling KK, Nowalk P, et al. Impact of age and pre-existing influenza immune responses in humans receiving split inactivated influenza vaccine on the induction of the breadth of antibodies to influenza A strains. PLoS ONE. 2017;12. 10.1371/journal.pone.0185666
- [5] Zhong W, Tobler S, Roayaei J. Live attenuated or inactivated influenza vaccines and medical encounters for respiratory illnesses among US military personnel. JAMA - Journal of the American Medical Association. 2009;301. 10.1001/jama.2009.265
- [6] Hoft DF, Lottenbach KR, Blazevic A, Turan A, Blevins TP, Pacatte TP, et al. Comparisons of the humoral and cellular immune responses induced by live attenuated influenza vaccine and inactivated influenza vaccine in adults. Clinical and Vaccine Immunology. 2017;24:e00414-16. 10.1128/CVI.00414-16
- [7] Ambrose CS, Wu X, Knuf M, Wutzler P. The efficacy of intranasal live attenuated influenza vaccine in children 2 through 17 years of age: A meta-analysis of 8 randomized controlled studies. Vaccine. 2012;30:886-92. 10.1016/j.vaccine.2011.11.104
- [8] Barr IG, Donis RO, Katz JM, McCauley JW, Odagiri T, Trusheim H, et al. Cell culture-derived influenza vaccines in the severe 2017-2018 epidemic season: a step towards



388 improved influenza vaccine effectiveness. NPJ Vaccines. 2018;3:1-5. 10.1038/s41541-018-  
389 0079-z

390 [9] Martin JM, Avula R, Nowalk MP, Lin CJ, Horne WT, Chandran UR, et al. Inflammatory  
391 mediator expression associated with antibody response induced by live attenuated vs  
392 inactivated influenza virus vaccine in children. Open Forum Infectious Diseases. 2018;5:1-  
393 10. 10.1093/ofid/ofy277

394 [10] Manenti A, Tete SM, Mohn KGI, Jul-Larsen Å, Gianhecchi E, Montomoli E, et al.  
395 Comparative analysis of influenza A(H3N2) virus hemagglutinin specific IgG subclass and  
396 IgA responses in children and adults after influenza vaccination. Vaccine. 2017;35:191-8.  
397 10.1016/j.vaccine.2016.10.024

398 [11] Jhaveri R. Live Attenuated Influenza Vaccine: Is Past Performance a Guarantee of  
399 Future Results? Clin Ther. 2018;40:1246-54. 10.1016/j.clinthera.2018.07.003

400 [12] Moehling KK, Zimmerman RK, Nowalk MP, Jeng Lin C, Martin JM, Alcorn JF, et al. A  
401 randomized controlled trial of antibody response to 2018-19 cell-based vs. egg-based  
402 quadrivalent inactivated influenza vaccine in children. Vaccine. 2020;38:5171-7.  
403 10.1016/j.vaccine.2020.06.023

404 [13] Centers for Disease Control. Flu Vaccination Coverage, United States, 2019–20  
405 Influenza Season. <https://www.cdc.gov/flu/fluview/coverage-1920estimates.htm>.  
406 Accessed May 25, 2021.

407 [14] Hinojosa M, Shepard SS, Chung JR, King JP, McLean HQ, Flannery B, et al. Impact of  
408 Immune Priming, Vaccination, and Infection on Influenza A(H3N2) Antibody Landscapes in  
409 Children. The Journal of Infectious Diseases. 2021;224:469-80. 10.1093/infdis/jiaa665

410 [15] Zost SJ, Parkhouse K, Gumina ME, Kim K, Perez SD, Wilson PC, et al. Contemporary  
411 H3N2 influenza viruses have a glycosylation site that alters binding of antibodies elicited by  
412 egg-adapted vaccine strains. Proceedings of the National Academy of Sciences of the  
413 United States of America. 2017;114. 10.1073/pnas.1712377114

414 [16] Rockman S, Laurie KL, Parkes S, Wheatley A, Barr IG. New Technologies for Influenza  
415 Vaccines. Microorganisms. 2020;8:45-58. 10.3390/microorganisms8111745

- 416 [17] Mohn KG, Smith I, Sjursen H, Cox RJ. Immune responses after live attenuated influenza  
417 vaccination. Hum Vaccin Immunother. 2018;14:571-8. 10.1080/21645515.2017.1377376
- 418 [18] Brickley EB, Wright PF, Khalenkov A, Neuzil KM, Ortiz JR, Rudenko L, et al. The Effect  
419 of Preexisting Immunity on Virus Detection and Immune Responses in a Phase II,  
420 Randomized Trial of a Russian-Backbone, Live, Attenuated Influenza Vaccine in  
421 Bangladeshi Children. Clinical Infectious Diseases. 2019;69:786-94. 10.1093/cid/ciy1004
- 422

**Table 1. Demographics by 2019-20 influenza vaccine type received.**

| Variable                                                        | Overall<br>N=198 | ccIIV4<br>N=100  | LAIV4<br>N=98    | p-value* |
|-----------------------------------------------------------------|------------------|------------------|------------------|----------|
| Age (years), median (Q1, Q3)                                    | 18.3 (14.6-20.5) | 18.1 (14.7-20.4) | 18.4 (14.3-20.7) | 0.61     |
| Age                                                             |                  |                  |                  | 0.75     |
| 4-11 years                                                      | 31 (15.7)        | 17 (17.0)        | 14 (14.3)        |          |
| 12-17 years                                                     | 59 (27.8)        | 31 (31.0)        | 28 (28.6)        |          |
| 18-21 years                                                     | 108 (54.5)       | 52 (52.0)        | 56 (57.1)        |          |
| Female (ref.=male), n (%)                                       | 124 (62.6)       | 64 (64.0)        | 60 (61.2)        | 0.69     |
| Non-white race (ref.=white), n (%)                              | 95 (48.0)        | 43 (43.0)        | 52 (53.1)        | 0.16     |
| Non-Hispanic (ref.=Hispanic), n (%)                             | 184 (92.9)       | 95 (95.0)        | 89 (90.8)        | 0.11     |
| Parental education < some college<br>(ref.=≥college), n (%)     | 122 (61.6)       | 62 (62.0)        | 60 (61.2)        | 0.99     |
| Public health insurance (ref.=other<br>insurance), n (%)        | 95 (48.0)        | 48 (48.0)        | 47 (48.0)        | 0.87     |
| Exposed to household smoking<br>(ref.=no smoke exposure), n (%) | 28 (14.1)        | 15 (15.0)        | 13 (13.3)        | 0.68     |
| Obese (ref.=non-obese), n (%)                                   | 31 (15.7)        | 13 (13.0)        | 18 (18.4)        | 0.28     |

|                               |            |           |           |      |
|-------------------------------|------------|-----------|-----------|------|
| 2018 influenza vaccine status |            |           |           | 0.48 |
| Vaccinated                    | 98 (49.5)  | 52 (52.0) | 46 (46.9) |      |
| Not vaccinated/no record      | 100 (50.5) | 48 (48.0) | 52 (53.1) |      |

\*Wilcoxon ranked sum for continuous variables, chi-square/Fisher's Exact for categorical variables.

Nonwhite race = AIAN, Asian, Black, NHPI, multi-race.

Other insurance = Private, non-insured, combined private and public insurance.

Obesity defined as  $\geq 95^{\text{th}}$  percentile for BMI if  $< 20$  years or  $\text{BMI} \geq 30$  if  $\geq 20$  years.

cclIV4 = cell-based quadrivalent inactivated influenza vaccine

LAIV4 = egg-based quadrivalent live-attenuated influenza vaccine

**Table 2. Pre- and post vaccination hemagglutination inhibition (HAI) assay titer responses by vaccine type**

|                                          | <b>cclIV4</b>              | <b>LAIV4</b>              | <b>p-value*</b>  |
|------------------------------------------|----------------------------|---------------------------|------------------|
|                                          | <b>N=100</b>               | <b>N=98</b>               |                  |
| <i>A/H1N1-A/Brisbane Egg Grown Virus</i> |                            |                           |                  |
| Day 0 HAI GMT (95% CI)                   | 90 (73-111)                | 94 (77-116)               | 0.79             |
| Day 28 HAI GMT (95% CI)                  | 269 (228-317) <sup>†</sup> | 108 (89-132) <sup>†</sup> | <b>&lt;0.001</b> |
| Mean fold-rise in HAI titer (95% CI)     | 3.0 (2.5-3.6)              | 1.1 (1.0-1.3)             | <b>&lt;0.001</b> |
| Seroconversion ≥1:40, n (%)              | 33 (33.0)                  | 5 (5.1)                   | <b>&lt;0.001</b> |
| Day 0 HAI titer ≥1:40, n (%)             | 83 (83.0)                  | 79 (80.6)                 | 0.66             |
| Day 28 HAI titer ≥1:40, n (%)            | 96 (96.0)                  | 85 (86.7)                 | <b>0.02</b>      |
| Day 0 HAI titer ≥1:110, n (%)            | 61 (61.0)                  | 54 (55.1)                 | 0.40             |
| Day 28 HAI titer ≥1:110, n (%)           | 93 (93.0)                  | 58 (59.2)                 | <b>&lt;0.001</b> |
| <i>A/H3N2-A/Kansas Egg Grown Virus</i>   |                            |                           |                  |
| Day 0 HAI GMT (95% CI)                   | 78 (66-95)                 | 75 (64-89)                | 0.79             |
| Day 28 HAI GMT (95% CI)                  | 205 (178-237) <sup>†</sup> | 96 (83-112) <sup>†</sup>  | <b>&lt;0.001</b> |
| Mean fold-rise in HAI titer (95% CI)     | 2.6 (2.2-3.1)              | 1.3 (1.1-1.4)             | <b>&lt;0.001</b> |
| Seroconversion ≥1:40, n (%)              | 44 (44.0)                  | 11 (11.2)                 | <b>&lt;0.001</b> |
| Day 0 HAI titer ≥1:40, n (%)             | 85 (85.0)                  | 83 (84.0)                 | 0.95             |
| Day 28 HAI titer ≥1:40, n (%)            | 99 (99.0)                  | 90 (91.8)                 | <b>0.02</b>      |
| Day 0 HAI titer ≥1:110, n (%)            | 41 (41.0)                  | 34 (34.7)                 | 0.36             |
| Day 28 HAI titer ≥1:110, n (%)           | 77 (77.0)                  | 41 (41.8)                 | <b>&lt;0.001</b> |
| <i>A/H3N2-A/Kansas Cell Grown Virus</i>  |                            |                           |                  |

|                                              |                            |                         |                  |
|----------------------------------------------|----------------------------|-------------------------|------------------|
| Day 0 HAI GMT (95% CI)                       | 46 (38-55)                 | 50 (43-58)              | 0.56             |
| Day 28 HAI GMT (95% CI)                      | 136 (113-165) <sup>†</sup> | 63 (58-74) <sup>†</sup> | <b>&lt;0.001</b> |
| Mean fold-rise in HAI titer (95% CI)         | 3.0 (2.5-3.6)              | 1.3 (1.1-1.4)           | <b>&lt;0.001</b> |
| Seroconversion ≥1:40, n (%)                  | 47 (47.0)                  | 8 (8.2)                 | <b>&lt;0.001</b> |
| Day 0 HAI titer ≥1:40, n (%)                 | 72 (72.0)                  | 81 (82.7)               | 0.07             |
| Day 28 HAI titer ≥1:40, n (%)                | 93 (93.0)                  | 80 (81.6)               | <b>0.02</b>      |
| Day 0 HAI titer ≥1:110, n (%)                | 24 (24.0)                  | 14 (14.3)               | 0.08             |
| Day 28 HAI titer ≥1:110, n (%)               | 65 (65.0)                  | 26 (26.5)               | <b>&lt;0.001</b> |
| <i>B/Victoria-B/Colorado Egg Grown Virus</i> |                            |                         |                  |
| Day 0 HAI GMT (95% CI)                       | 65 (53-79)                 | 65 (53-81)              | 0.95             |
| Day 28 HAI GMT (95% CI)                      | 158 (134-186) <sup>†</sup> | 78 (64-94) <sup>†</sup> | <b>&lt;0.001</b> |
| Mean fold-rise in HAI titer (95% CI)         | 2.4 (2.0-2.9)              | 1.2 (1.0-1.4)           | <b>&lt;0.001</b> |
| Seroconversion ≥1:40, n (%)                  | 28 (28.0)                  | 9 (9.2)                 | <b>&lt;0.001</b> |
| Day 0 HAI titer ≥1:40, n (%)                 | 75 (75.0)                  | 72 (73.5)               | 0.81             |
| Day 28 HAI titer ≥1:40, n (%)                | 96 (96.0)                  | 79 (80.6)               | <b>&lt;0.001</b> |
| Day 0 HAI titer ≥1:110, n (%)                | 34 (34.0)                  | 34 (34.7)               | 0.91             |
| Day 28 HAI titer ≥1:110, n (%)               | 71 (71.0)                  | 36 (36.7)               | <b>&lt;0.001</b> |
| <i>B/Yamagata-B/Phuket Egg Grown Virus</i>   |                            |                         |                  |
| Day 0 HAI GMT (95% CI)                       | 89 (74-107)                | 101 (83-122)            | 0.44             |
| Day 28 HAI GMT (95% CI)                      | 215 (191-241) <sup>†</sup> | 107 (90-128)            | <b>&lt;0.001</b> |
| Mean fold-rise in HAI titer (95% CI)         | 2.4 (2.0-2.9)              | 1.1 (1.0-1.2)           | <b>&lt;0.001</b> |
| Seroconversion ≥1:40, n (%)                  | 29 (29.0)                  | 4 (4.1)                 | <b>&lt;0.001</b> |
| Day 0 HAI titer ≥1:40, n (%)                 | 86 (86.0)                  | 84 (85.7)               | 0.95             |

|                                       |           |           |                  |
|---------------------------------------|-----------|-----------|------------------|
| Day 28 HAI titer $\geq 1:40$ , n (%)  | 100 (100) | 89 (90.8) | <b>0.002</b>     |
| Day 0 HAI titer $\geq 1:110$ , n (%)  | 51 (51.0) | 57 (58.2) | 0.31             |
| Day 28 HAI titer $\geq 1:110$ , n (%) | 84 (84.0) | 57 (58.2) | <b>&lt;0.001</b> |

cclIV4 = cell-based quadrivalent inactivated influenza vaccine; LAIV4 = egg-based quadrivalent live-attenuated influenza vaccine; GMT = geometric mean titer; CI = confidence interval; Seroconversion = HAI titer ratio of day 28/day 0  $\geq 4$  and HAI titer at day 28  $\geq 40$ . Primary outcome was mean fold-rise in HAI titer.

\*t-test was used to compare log titers by vaccine type; Chi-square test was used to compare rates.

<sup>†</sup>p<0.05 for paired t-test comparison to Day 0 GMT.

**Figure 1: CONSORT 2010 Flow Diagram**

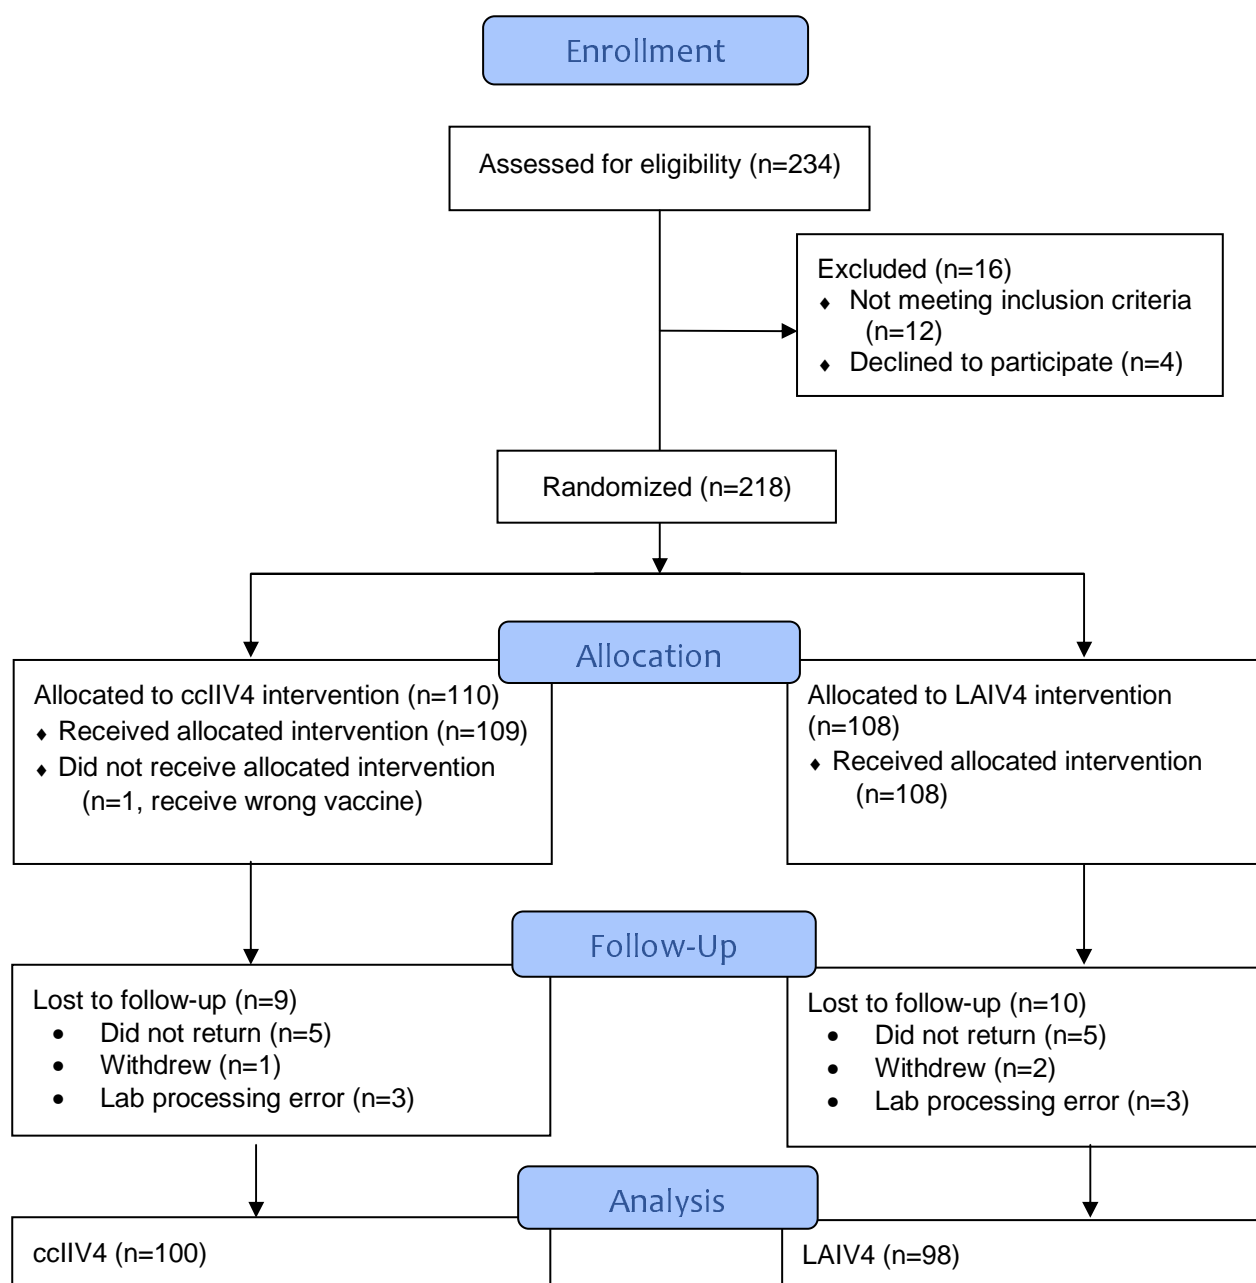



**Figure 2.** Pre- and post-vaccination GMT hemagglutination inhibition (HAI) assay titers by vaccine type for A/H3N2-A/Kansas egg and cell grown viruses. Data are day 0 (black) and day 28 (gray) with 95% confidence Intervals (CI), GMFR with 95% CI is shown horizontally above bars. Within each vaccine type, egg grown antigens were higher than cell grown at days 0 and 28 ( $p < 0.001$ ), but the GMFR did not differ between egg and cell. Between vaccine types, HAI titers at day 28 and GMFR were lower for LAIV4 for each respective antigen ( $p < 0.001$ ).

**Figure 3a.** Hemagglutination inhibition (HAI) titers for influenza A antigens on day 0 and day 28 for cclIV4 (left) and LAIV4 (right). Identical day 0 and day 28 titers fall on the dotted line. Data points above the line represent an increase in HAI at day 28 and data points below represent a decrease.

**Figure 3b.** Hemagglutination inhibition (HAI) titers for influenza B antigens on day 0 and day 28 for cclIV4 (left) and LAIV4 (right). Identical day 0 and day 28 titers fall on the dotted line. Data points above the line represent an increase in HAI at day 28 and data points below represent a decrease.

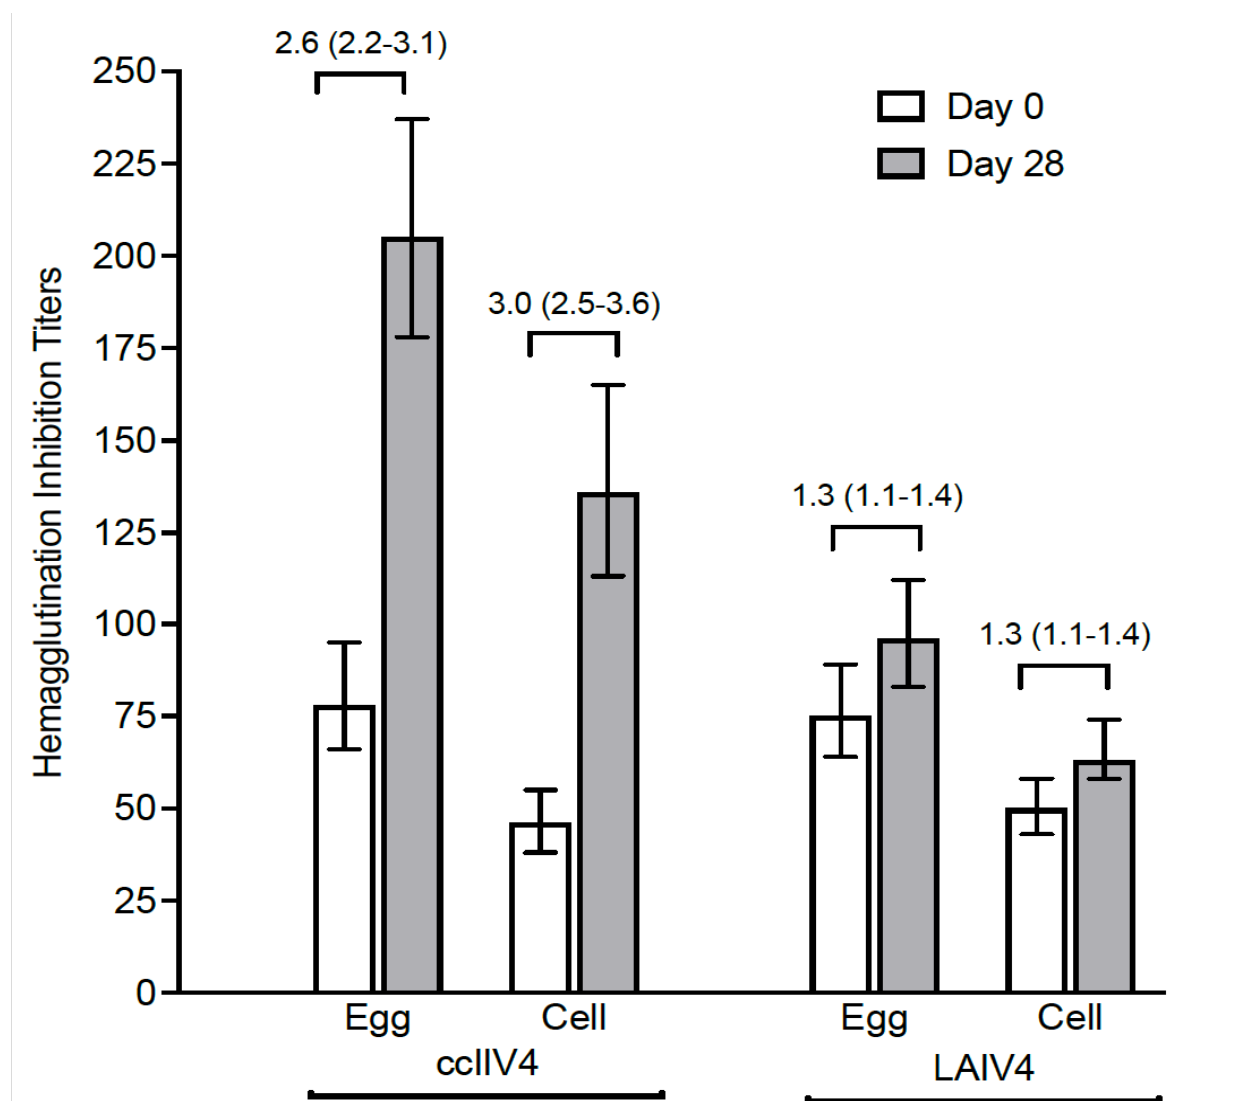

Figure 2. Pre- and post-vaccination GMT hemagglutination inhibition (HAI) assay titers by vaccine type for A/H3N2-A/Kansas egg and cell grown viruses. Data are day 0 (white) and day 28 (gray) with 95% confidence Intervals (CI), GMFR with 95% CI is shown horizontally above bars. Within each vaccine type, egg grown antigens were higher than cell grown at days 0 and 28 ( $p < 0.001$ ), but the GMFR did not differ between egg and cell. Between vaccine types, HAI titers at day 28 and GMFR were lower for LAIV4 for each respective antigen ( $p < 0.0001$ ).

H1N1-A/Brisbane Egg-Grown Virus, cclIV4

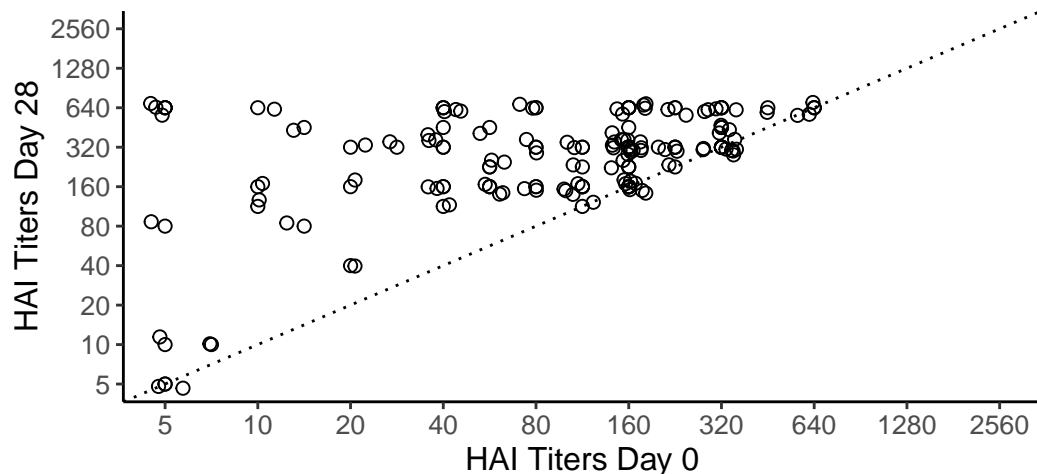

H1N1-A/Brisbane Egg-Grown Virus, LAIV4

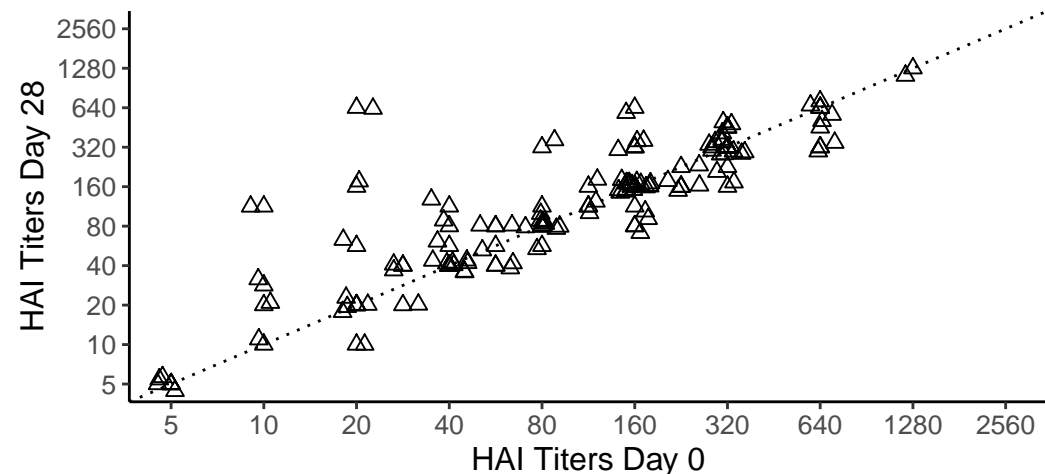

H3N2 A/Kansas Egg-Grown Virus, cclIV4

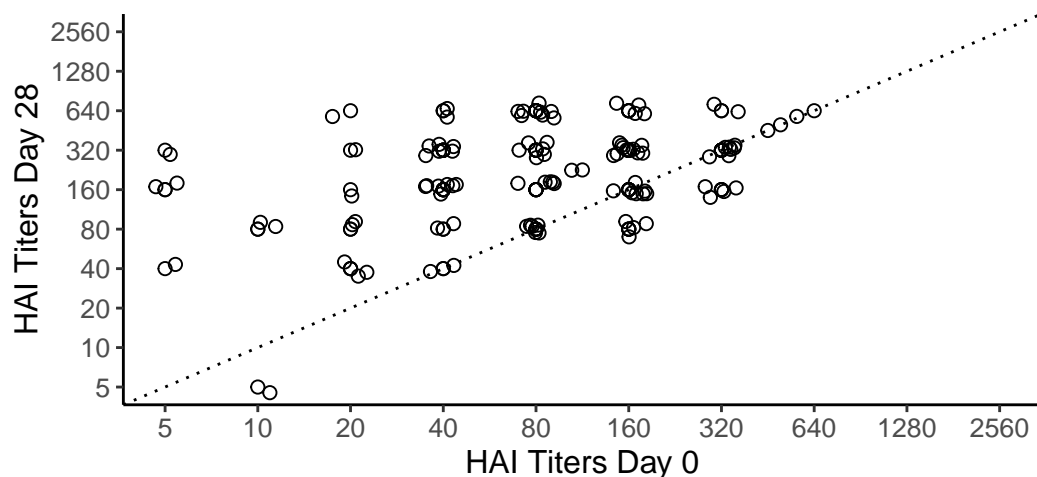

H3N2-A/Kansas Egg-Grown Virus, LAIV4

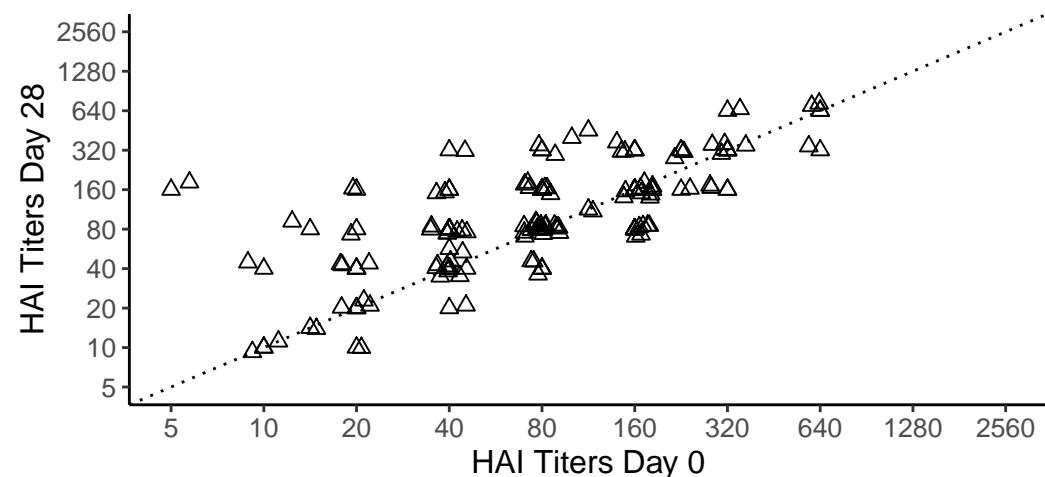

H3N2 A/Kansas Cell-Grown Virus, cclIV4

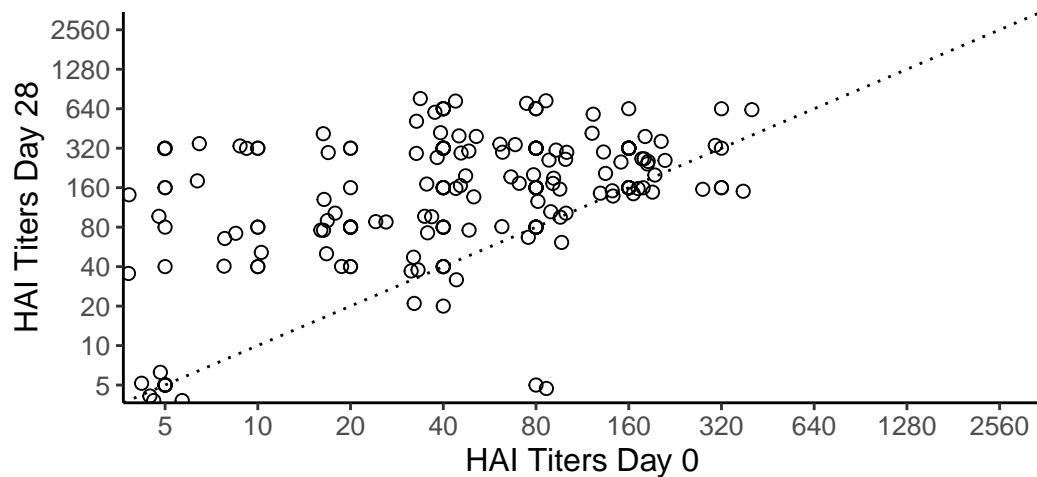

H3N2-A/Kansas Cell-Grown Virus, LAIV4

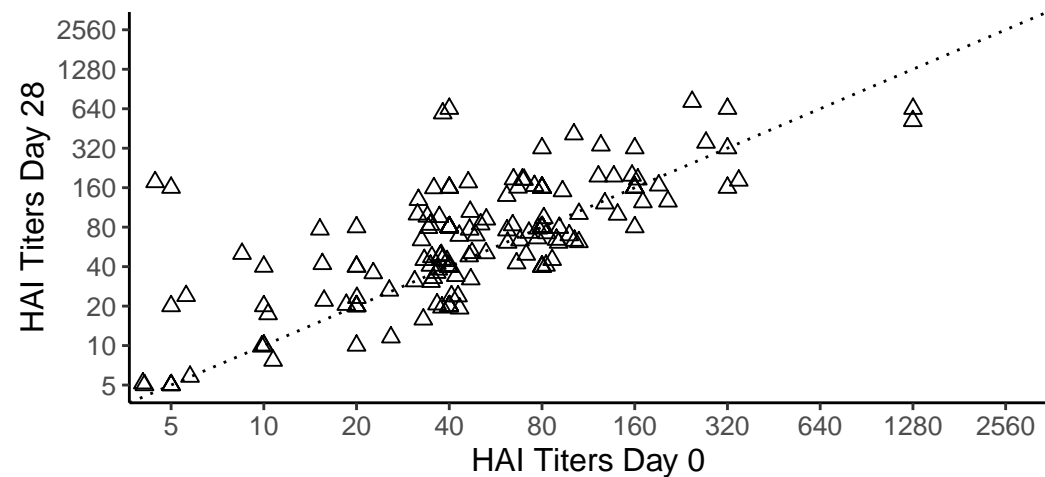

B/Victoria–B/Colorado Egg–Grown Virus, cclIV4

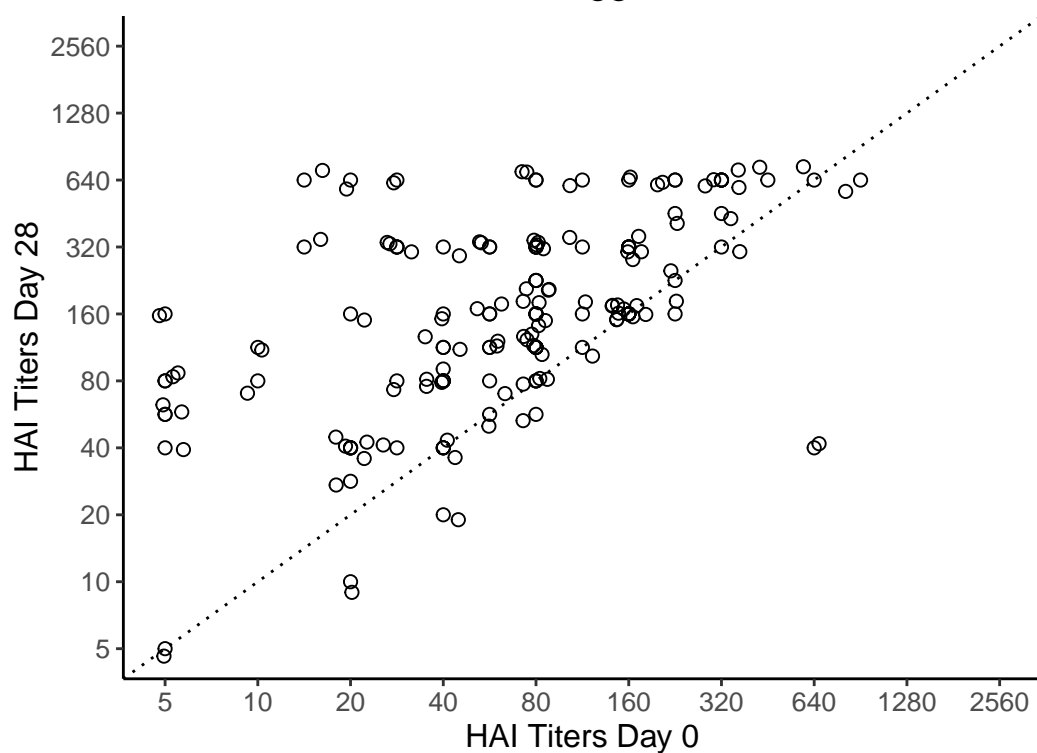

B/Victoria–B/Colorado Egg–Grown Virus, LAIV4

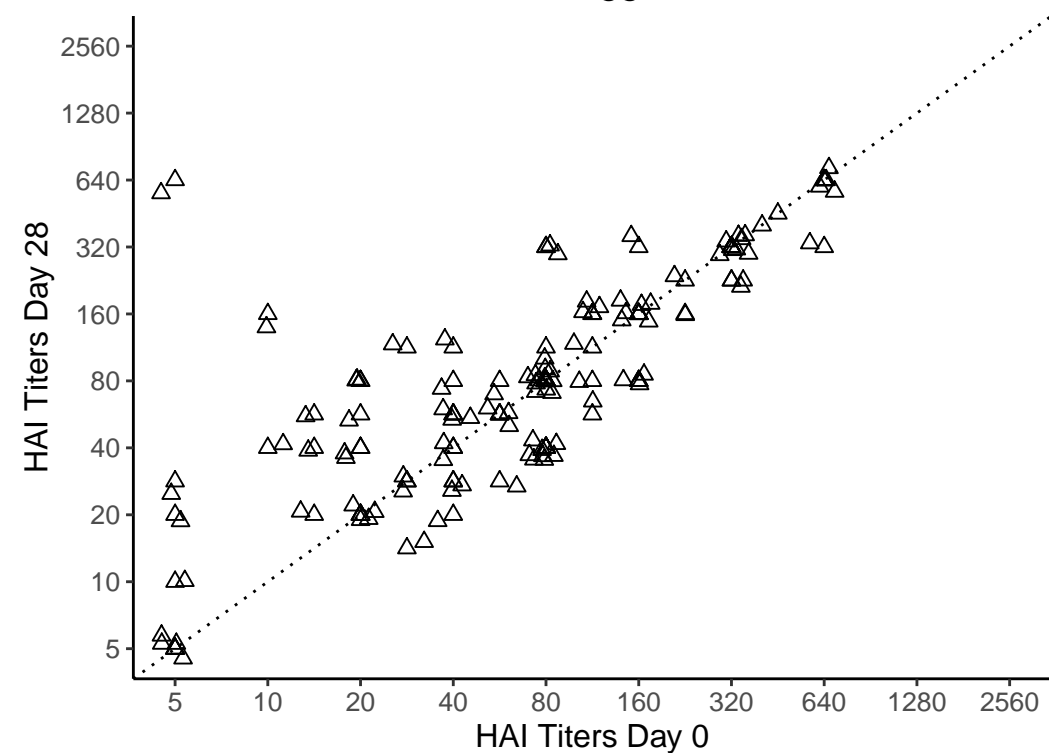

B/Yamagata–B/Phuket Egg–Grown Virus, cclIV4

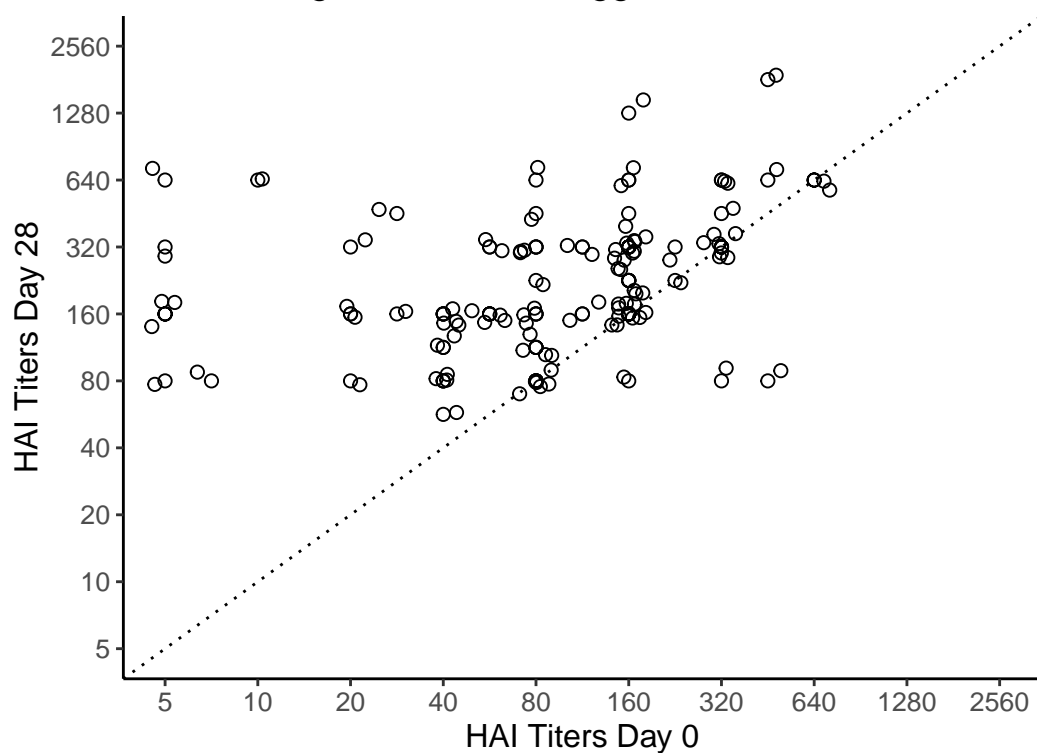

B/Yamagata–B/Phuket Egg–Grown Virus, LAIV4

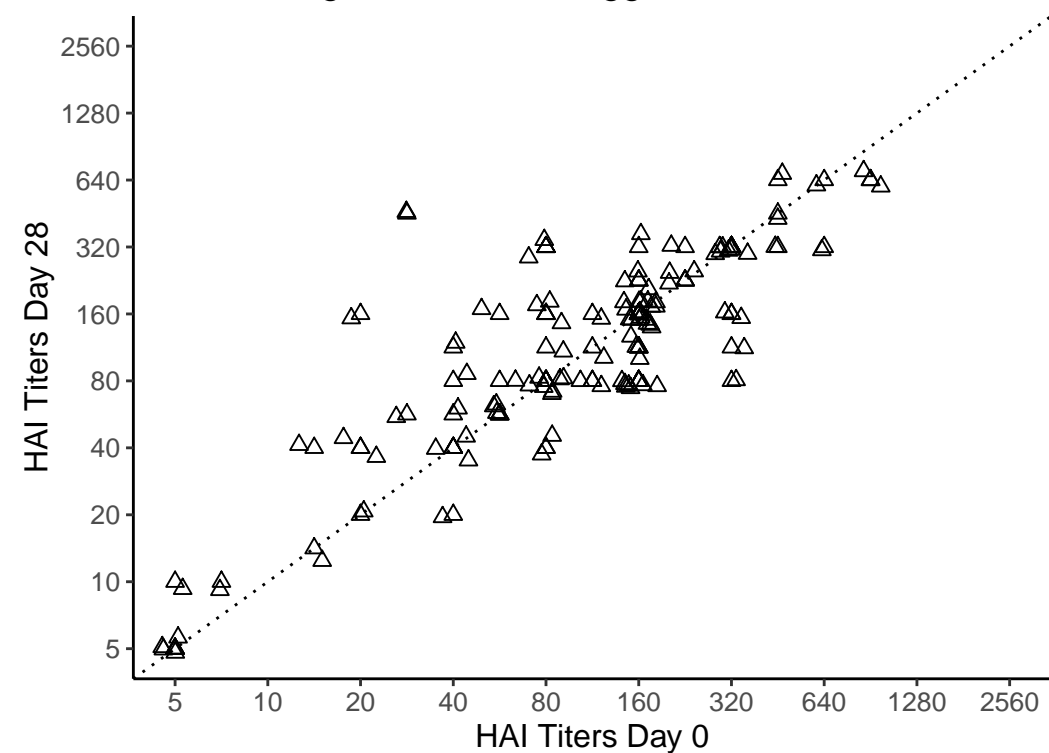

Source: http://medrxiv.stage.highwire.org/content/10.1101/2021.09.02.21263043v1.full.pdf
